# Supplementary material for: Conserved Motifs and Prediction of Regulatory Modules inCaenorhabditis elegans
Source: Oxford University Press journal article supplement (doi:10.1534/g3.111.001081), 2012-04-01
Supplement: 469_tables1.pdf [file 469_tables1.pdf]

**Table S1 Associations between CHIP-seq data sets and Phylonet Matrices**

| ChIP-Seq Sample <sup>1</sup> | DNA-binding domain <sup>2</sup> | Known_Specificity <sup>3</sup> | PhyloNet Matrix                                                      | Cons_Seq <sup>4</sup>                                                                       |
|------------------------------|---------------------------------|--------------------------------|----------------------------------------------------------------------|---------------------------------------------------------------------------------------------|
| ALR1_L2                      | Homeobox                        | ?                              | Y64G10A.6.5<br>C54D1.6.3<br>H06I04.2.10<br>F46H5.2b.3<br>Y65B4BR.1.1 | tTTtCCTGTTTC<br>tKCTTTTTCTT<br>gAAAAGacMAAaGGA<br>cAAAAGAAAA<br>GaGATGAAgAACGa              |
| BLMP1_L1                     | C2H2 ZF                         | GAAAGTGAAAGT<br>Dm: Blimp-1    | Y64G10A.6.5<br>H06I04.2.10<br>ZK563.5.1<br>C54D1.6.3<br>C04E6.2.1    | tTTtCCTGTTTC<br>gAAAAGacMAAaGGA<br>GAacAAatGAAACGA<br>tKCTTTTTCTT<br><b>GAAAGTGACA</b>      |
| CEH14_L2                     | Homeobox                        | TAATTA<br>Dm: Lim3             | Y57G11C.47.3<br>B0213.8.1<br>Y17D7B.3.6<br>C54E4.3.1<br>C08G5.5.5    | GtCRctgGCGGCG<br>GCcKnggMGACagC<br>ntGTGCTCggC<br>gCGTGTCGGTG<br>GCnCCGMGCcg                |
| CEH30_Late_EMB               | Homeobox                        | TAATtg<br>Dm: B-H2             | C48D5.3.10<br>R13H7.1.1<br>F40F9.1b.2<br>C41C4.4.7<br>C33A12.19.4    | AGTGTgnRAGAnGaAGAG<br>GCaGACGSG<br>GACGCAGA<br>GnaGAGanGGCaGA<br>cGaAGGAcGCaccc             |
| DPY27_EMB                    | RecF/RecN/SMC                   | ?                              | Y104H12A.1.1<br>C52B9.1b.1<br>ZK1073.1.10<br>F57C7.4.1<br>C09B8.3.3  | CcCGGGTTCgAtYCCCG<br>GaAGAgGCRCCAGg<br>CaaagCgGCCAcCc<br>CaCGcggTTTCTC<br>GgGRgCGaGG        |
| EGL27_L1                     | GATA ZF                         | GATA                           | C48D5.3.10<br>F54C9.11.9<br>R107.1.4<br>Y47D3A.23b.2<br>F40F9.1b.2   | AGTGTgnRAGAnGaAGAG<br>GAGAGAKcaRnaSR<br>cAGaCGAAGg<br>CgcCttcntcncCgTCgcCntCnTC<br>GACGCAGA |
| EGL5_L3                      | Homeobox                        | ?                              | Y65B4BR.1.1<br>T06A1.3.8<br>C24A3.2b.5<br>F27B3.2.1<br>F26D11.11a.2  | GaGATGAAgAACGa<br>SCTCCtSCctC<br>ttgTgCTTtTGcTCc<br>CCnCCtCCCCg<br>GnAGaAGMAGaAGMAGc        |
| ELT3_L1                      | GATA ZF                         | GATA                           | Y64G10A.6.5<br>C54D1.6.3<br>F46H5.2b.3<br>ZK563.5.1<br>C01F1.4.1     | tTTtCCTGTTTC<br>tKCTTTTTCTT<br>cAAAAGAAAA<br>GAacAAatGAAACGA<br>tTTtCCannTTTCC              |
| EOR1_L3                      | C2H2 ZF                         | ?                              | F53A9.3.1<br>R107.1.4<br>Y64G10A.6.5<br>C54D1.6.3                    | tTCGTTTTTCGTCGcg<br>cAGaCGAAGg<br>tTTtCCTGTTTC<br>tKCTTTTTCTT                               |

|           |          |                    |                                                                                          |                                                                                                               |
|-----------|----------|--------------------|------------------------------------------------------------------------------------------|---------------------------------------------------------------------------------------------------------------|
| GEI11_L4  | Myb      | ?                  | Y10G11A.2b.3<br>Y57G11C.23.10<br>Y57G11C.48.3<br>F55B11.2.8<br>T28F2.2.1<br>Y73F8A.11.10 | GgCaatGGcaAGRAaG<br>ggRncCGAgacgnncSGGS<br>GnCcGGRGCacACA<br>GGCnGAnggCggnnGg<br>GccGcnGnCGaCnc<br>GnGGCCGgca |
| HLH1_EMB  | bHLH     | CANNTG             | M176.5.1<br>T23H2.5.1<br>R05H11.1.1<br>F55B11.2.1<br>F26F12.4.1                          | CAGCcGTcCcg<br><b>caGCTGCTGTTC</b><br>CYnCCaCCaGC<br><b>CggCatCTgCCGg</b><br>cgngGcAAccGGtgGg                 |
| LIN11_L2  | Homeobox | TAATTA<br>Dm: Lim1 | F45E1.6.10<br>C08G5.5.5<br>R03C1.1.2<br>T26G10.1.3<br>C36C9.4.3                          | gcngngcgnGccGCGnCGcg<br>GCnCCGMGCcg<br>GCGnGnngcKCGnCGgC<br>gGccRCgRnnGCGGncG<br>cGCSGCCGCncSg                |
| LIN13_EMB | C2H2 ZF  | ?                  | F58D5.2a.2<br>C09G4.5.7<br>R13H7.1.1<br>M01H9.5.1<br>F07A5.4.2                           | GSgGgggGgnGGGnGaGGG<br>CGCgCSagCGc<br>GCaGACGSG<br>tgCGTTGGCGCG<br>CnCCcnnnnCnSCtCCnCC                        |
| LIN15B_L3 | C2H2 ZF  | ?                  | T08B6.6.2<br>C09G4.5.7<br>C06A8.4.1<br>M01H9.5.1<br>Y17G7B.5b.5                          | gggGCGCgtttGC<br>CGCgCSagCGc<br>gCaGTGGaGCG<br>tgCGTTGGCGCG<br>gnSGCGagSGCGC                                  |
| LIN39_L3  | Homeobox | ?                  | F15A4.12.6<br>C05D2.1c.4<br>F07A5.4.2<br>F55C5.10.1<br>K02A6.2.4                         | cnCngnYnCCRctKCCnCC<br>SgCSgCCnnCccCcnCCC<br>CnCCcnnnnCnSCtCCnCC<br>GGRaAgGGGcSG<br>CnGcTCcnGCcgCtCC          |
| MAB5_L3   | Homeobox | tTAATga<br>Dm: Dfd | F15A4.12.6<br>VC5.4.1<br>C05D2.1c.4<br>T26G10.1.3<br>B0213.8.1                           | cnCngnYnCCRctKCCnCC<br>GnGGCcGncGcnnnGcGg<br>SgCSgCCnnCccCcnCCC<br>gGccRCgRnnGCGGncG<br>GCcKnggMGACagC        |
| MDL1_L1   | bHLH     | CANNTG             | C33A11.2.1<br>T07D4.1.3<br>E04D5.1b.4<br>C54E4.3.1<br>R07B7.6.4                          | <b>nGGGTACGtG</b><br><b>CaCCACGTGC</b><br>CGCCgTCTCGtg<br>gCGTGTCGGTG<br>CcnCCCCtCgnCc                        |
| MEP1_EMB  | C2H2 ZF  | ?                  | R13H7.1.1<br>C09G4.5.7<br>M01H9.5.1<br>F22F7.7.4<br>Y17D7B.3.6                           | GCaGACGSG<br>CGCgCSagCGc<br>tgCGTTGGCGCG<br>cTCGnCtCATTTg<br>ntGTGCTCggC                                      |
| PES1_L4   | forkhead | ?                  | C08G5.5.5<br>Y17G7B.5b.5<br>VC5.4.1                                                      | GCnCCGMGCcg<br>gnSGCGagSGCGC<br>GnGGCcGncGcnnnGcGg                                                            |

|                 |          |         |                                                                                            |                                                                                                                            |
|-----------------|----------|---------|--------------------------------------------------------------------------------------------|----------------------------------------------------------------------------------------------------------------------------|
| PHA4_EMB        | forkhead | TRTTKRY | F18E3.5.6<br>C09G4.5.7<br>Y17D7B.3.6<br>D1053.4.6<br>F36G3.3.5<br>R05H10.1.3<br>F58D5.2a.2 | cStcSCGCGCC<br>CGCgCSagCGc<br>ntGTGCTCggC<br>cCnCCtGcgCagtcnadc<br>gCtCaCgCTGCTCgc<br>gGcYGaGGRcGAG<br>GSgGgggGgnGGGnGaGGG |
| PHA4_L1         | forkhead | TRTTKRY | Y64G10A.6.5<br>H32C10.2.4<br>H42K12.1a.1<br>H06I04.2.10<br>Y17D7B.3.6                      | tTTtCCTGTTTC<br><b>tgTtTG TGCTcgc</b><br><b>TGTTTGT TGT</b><br>gAAAAGacMAAaGGA                                             |
| PHA4_L2         | forkhead | TRTTKRY | Y64G10A.6.5<br>H32C10.2.4<br>Y17D7B.3.6<br>C39F7.1.7<br>F26A10.2.9                         | ntGTGCTCggC<br>tTTtCCTGTTTC<br><b>tgTtTG TGCTcgc</b><br>ntGTGCTCggC<br>gCTCTcCGcG<br>GTTTcGCTtTCt                          |
| PHA4_Late_EMB   | forkhead | TRTTKRY | Y17D7B.3.6<br>C26B9.1a.2<br>F27B3.2.1<br>C39F7.1.7<br>C48D5.3.10                           | ntGTGCTCggC<br>GgaRnGGntGnGGntGtG<br>CCnCCtCCCCg<br>gCTCTcCGcG<br>AGTGTgnRAGAnGaAGAG                                       |
| PHA4_Starved_L1 | forkhead | TRTTKRY | H32C10.2.4<br>Y64G10A.6.5<br>H42K12.1a.1<br>Y17D7B.3.6<br>H06I04.2.10                      | <b>tgTtTG TGCTcgc</b><br>tTTtCCTGTTTC<br><b>TGTTTGT TGT</b><br>ntGTGCTCggC<br>gAAAAGacMAAaGGA                              |
| PHA4_YA         | forkhead | TRTTKRY | F57B1.6b.1<br>T07D4.1.3<br>Y11D7A.4.3<br>C54E4.3.1<br>C01F1.4.1                            | GCACCAAAAagagn<br>CaCCACGTGC<br>tCTCGaCCTGC<br>gCGTGTCGGTG<br>tTTCCannTTTCC                                                |
| PQM1_L3         | C2H2 ZF  | ?       | C17G1.3b.4<br>Y64G10A.6.5<br>C01F1.4.1<br>C04E6.2.1<br>C52A11.2.2                          | TCTTATCAg<br>tTTtCCTGTTTC<br>tTTtCCannTTTCC<br>GAAAGTGACA<br>SaGGTGATGAgAA                                                 |
| SKN1_L1         | bZIP     | ?       | C09G4.5.7<br>Y17G7B.5b.5<br>F18E3.5.6<br>T07G12.3.4<br>T26G10.1.3                          | CGCgCSagCGc<br>gnSGCGagSGCGC<br>cStcSCGCGCC<br>gGGccCGCGgC<br>gGccRCgRnnGCGGncG                                            |
| UNC130_L1       | forkhead | ?       | R05H11.1.1<br>C31E10.3.6<br>C33A11.2.1<br>F59B1.1.1<br>C03A7.5.1                           | CYnCCaCCaGC<br>cCCnCCMcCncCnc<br>nGGGTACAGtG<br>CcCCaTCCnCC<br>CnCCACCM                                                    |

1. The TF name is given followed by information about the source of the sample. EMB refers to samples from embryos, Lx refers to samples taken from worms at larval stage x and YA refers to young adult.
2. DNA-binding domain class. ZF refers to zinc fingers
3. Known specificities. "Dm:" refers to inference of binding specificity based on the listed orthologous TF from *Drosophila melanogaster*.
4. Matches to the known motif are shown in bold.
